# Supplementary material for: Investigation of titanium(iv)-oxo complexes stabilized with α-hydroxy carboxylate ligands: structural analysis and DFT studies
Source: Royal Society of Chemistry journal article supplement (doi:10.1039/d4dt01710b), 2024-01-01
Supplement: d4dt01710b6.pdf [file d4dt01710b6.pdf]

# Supplementary Information

## Investigation of Titanium(IV)-Oxo Complexes Stabilized with $\alpha$ -Hydroxy Carboxylate Ligands: Structural Analysis And DFT Studies

Barbara Kubiak<sup>1\*</sup>, Tadeusz Muziol<sup>1</sup>, Mirosław Jabłoński<sup>2</sup>, Aleksandra Radtke<sup>1</sup>,  
Piotr Piszczek<sup>1\*</sup>

<sup>1</sup> Department of Inorganic and Coordination Chemistry, Faculty of Chemistry, Nicolaus Copernicus University in Toruń, Gagarina 7, 87-100 Toruń, Poland

<sup>2</sup> Department of Quantum Chemistry and Atomic Spectroscopy, Faculty of Chemistry, Nicolaus Copernicus University in Toruń, Gagarina 7, 87-100 Toruń, Poland

\* Correspondence: [piszczek@umk.pl](mailto:piszczek@umk.pl), [basiak0809@gmail.com](mailto:basiak0809@gmail.com)

**Table S1.** Crystal data and structure refinement for (1) and (2).

| Empirical formula                          | C <sub>58</sub> H <sub>86</sub> O <sub>17</sub> Ti <sub>4</sub> (1)                                            | C <sub>80</sub> H <sub>76</sub> O <sub>30</sub> Ti <sub>6</sub> (2)                                                          |
|--------------------------------------------|----------------------------------------------------------------------------------------------------------------|------------------------------------------------------------------------------------------------------------------------------|
| Formula weight                             | 1246.86                                                                                                        | 1804.80                                                                                                                      |
| Temperature                                | 100(2) K                                                                                                       | 100(2) K                                                                                                                     |
| Wavelength [Å]                             | 1.54184                                                                                                        | 1.54184                                                                                                                      |
| Crystal system                             | Monoclinic                                                                                                     | Triclinic                                                                                                                    |
| Space group                                | C2/c                                                                                                           | P-1                                                                                                                          |
| Unit cell dimensions<br>[Å] and [°]        | a = 22.4667(4)<br>b = 12.6262(2)<br>c = 23.0730(5)<br>$\alpha = 90$<br>$\beta = 106.0037(19)$<br>$\gamma = 90$ | a = 12.4059(10)<br>b = 12.5243(11)<br>c = 17.3816(13)<br>$\alpha = 77.520(7)$<br>$\beta = 69.528(8)$<br>$\gamma = 63.331(9)$ |
| Volume [Å <sup>3</sup> ]                   | 6291.4(2)                                                                                                      | 2255.3(4)                                                                                                                    |
| Z, calculated density [Mg/m <sup>3</sup> ] | 4, 1.316                                                                                                       | 1, 1.329                                                                                                                     |
| Absorption coefficient [mm <sup>-1</sup> ] | 4.707                                                                                                          | 4.956                                                                                                                        |
| F(000)                                     | 2632                                                                                                           | 928                                                                                                                          |
| Crystal size [mm <sup>3</sup> ]            | 0.080 × 0.040 × 0.020                                                                                          | 0.120 × 0.060 × 0.040                                                                                                        |
| Theta range for data collection [°]        | 3.986 to 74.492                                                                                                | 3.960 to 74.443                                                                                                              |
| Index ranges                               | -26 ≤ h ≤ 27<br>-15 ≤ k ≤ 15<br>-27 ≤ l ≤ 28                                                                   | -14 ≤ h ≤ 15<br>-12 ≤ k ≤ 15<br>-21 ≤ l ≤ 21                                                                                 |
| Reflections collected/unique               | 29621/ 6404<br>[R(int) = 0.0474]                                                                               | 27429/ 8652<br>[R(int) = 0.0968]                                                                                             |
| Completeness to theta                      | 67.684° 99.9 %                                                                                                 | 67.684° 97.8 %                                                                                                               |
| Absorption correction                      | Numerical                                                                                                      | Semi-empirical from equivalents                                                                                              |
| Max. and min. transmission                 | 1.000 and 0.746                                                                                                | 1.00000 and 0.65108                                                                                                          |
| Refinement method                          | Full-matrix least-squares on F2                                                                                | Full-matrix least-squares on F2                                                                                              |
| Data / restraints / parameters             | 6404 / 0 / 397                                                                                                 | 8652 / 3 / 531                                                                                                               |
| Goodness-of-fit on F2                      | 1.095                                                                                                          | 1.019                                                                                                                        |
| Final R indices [I > 2σ(I)]                | R1 <sup>a</sup> = 0.0428, wR2 <sup>b</sup> = 0.1131                                                            | R1 <sup>a</sup> = 0.0941, wR2 <sup>b</sup> = 0.2558                                                                          |

|                             |                                                     |                                                     |
|-----------------------------|-----------------------------------------------------|-----------------------------------------------------|
| R indices (all data)        | R1 <sup>a</sup> = 0.0498, wR2 <sup>b</sup> = 0.1169 | R1 <sup>a</sup> = 0.1461, wR2 <sup>b</sup> = 0.2977 |
| Extinction coefficient      | 0.00009(2)                                          | nd                                                  |
| Largest diff. peak and hole | 0.470 and -0.630 e·Å <sup>-3</sup>                  | 0.851 and -0.953 e·Å <sup>-3</sup>                  |

---

$$^a R1 = \frac{\sum ||F_o| - |F_d||}{\sum |F_o|} \quad ^b wR2 = \left[ \frac{\sum w(F_o^2 - F^2)^2}{\sum (w(F_o^2)^2)} \right]^{1/2}$$

**Table S2.** Experimental and theoretical (B3LYP/6-31G(d,p)) values of bond lengths [Å] and angles [°] for **1** and **2**.

| [Ti <sub>4</sub> O(O <sup>i</sup> Pr) <sub>10</sub> (O <sub>3</sub> C <sub>14</sub> H <sub>8</sub> ) <sub>2</sub> ] ( <b>1</b> ) |               |       | [Ti <sub>6</sub> O <sub>4</sub> (O <sup>i</sup> Pr) <sub>2</sub> (O <sub>3</sub> C <sub>14</sub> H <sub>8</sub> ) <sub>4</sub> (O <sub>2</sub> CEt) <sub>6</sub> ] ( <b>2</b> ) |               |       |
|----------------------------------------------------------------------------------------------------------------------------------|---------------|-------|---------------------------------------------------------------------------------------------------------------------------------------------------------------------------------|---------------|-------|
| Parameter                                                                                                                        | Distances [Å] |       | Parameter                                                                                                                                                                       | Distances [Å] |       |
|                                                                                                                                  | Exp.          | Calc. |                                                                                                                                                                                 | Exp.          | Calc. |
| Ti(1)-O(31)                                                                                                                      | 1.7921(15)    | 1.793 | Ti(1)-O(17)                                                                                                                                                                     | 1.794(5)      | 1.800 |
| Ti(1)-O(41)                                                                                                                      | 1.8195(16)    | 1.821 | Ti(1)-O(16)                                                                                                                                                                     | 1.884(4)      | 1.901 |
| Ti(1)-O(16)                                                                                                                      | 1.8293(7)     | 1.824 | Ti(1)-O(21)                                                                                                                                                                     | 1.929(4)      | 1.884 |
| Ti(1)-O(21)                                                                                                                      | 2.0940(15)    | 2.139 | Ti(1)-O(61)                                                                                                                                                                     | 2.008(5)      | 2.055 |
| Ti(1)-O(1)                                                                                                                       | 2.1801(15)    | 2.212 | Ti(1)-O(52)                                                                                                                                                                     | 2.028(4)      | 2.036 |
| Ti(1)-O(2)#1                                                                                                                     | 2.2274(15)    | 2.283 | Ti(1)-O(23)                                                                                                                                                                     | 2.093(5)      | 2.147 |
| Ti(1)-Ti(2)                                                                                                                      | 3.3510(5)     | 3.419 | Ti(1)-Ti(3)                                                                                                                                                                     | 3.1182(18)    | 3.163 |
| Ti(2)-O(61)                                                                                                                      | 1.778(2)      | 1.788 | Ti(2)-O(17)#1                                                                                                                                                                   | 1.800(4)      | 1.802 |
| Ti(2)-O(51)                                                                                                                      | 1.7819(19)    | 1.796 | Ti(2)-O(16)                                                                                                                                                                     | 1.894(4)      | 1.895 |
| Ti(2)-O(3)                                                                                                                       | 1.8773(16)    | 1.873 | Ti(2)-O(1)                                                                                                                                                                      | 1.936(5)      | 1.881 |
| Ti(2)-O(21)                                                                                                                      | 1.9695(16)    | 1.973 | Ti(2)-O(41)                                                                                                                                                                     | 2.010(5)      | 2.042 |
| Ti(2)-O(1)                                                                                                                       | 2.0651(15)    | 2.106 | Ti(2)-O(62)#1                                                                                                                                                                   | 2.022(5)      | 2.052 |
| O(1)-C(2)                                                                                                                        | 1.299(2)      | 1.301 | Ti(2)-O(3)                                                                                                                                                                      | 2.094(4)      | 2.169 |
| O(2)-C(2)                                                                                                                        | 1.226(3)      | 1.234 | Ti(2)-Ti(3)                                                                                                                                                                     | 3.1185(15)    | 3.164 |
| C(3)-O(3)                                                                                                                        | 1.393(3)      | 1.401 | Ti(3)-O(71)                                                                                                                                                                     | 1.728(5)      | 1.740 |
|                                                                                                                                  |               |       | Ti(3)-O(3)                                                                                                                                                                      | 1.940(4)      | 1.962 |
|                                                                                                                                  |               |       | Ti(3)-O(23)                                                                                                                                                                     | 1.953(4)      | 1.972 |
|                                                                                                                                  |               |       | Ti(3)-O(42)                                                                                                                                                                     | 2.002(6)      | 2.040 |
|                                                                                                                                  |               |       | Ti(3)-O(51)                                                                                                                                                                     | 2.006(6)      | 2.050 |
|                                                                                                                                  |               |       | Ti(3)-O(16)                                                                                                                                                                     | 2.077(4)      | 2.070 |
|                                                                                                                                  |               |       | O(1)-C(2)                                                                                                                                                                       | 1.323(9)      | 1.331 |
|                                                                                                                                  |               |       | O(2)-C(2)                                                                                                                                                                       | 1.205(8)      | 1.207 |
|                                                                                                                                  |               |       | C(3)-O(3)                                                                                                                                                                       | 1.435(8)      | 1.423 |
| Angles [°]                                                                                                                       |               |       | Angles [°]                                                                                                                                                                      |               |       |
|                                                                                                                                  | Exp.          | Calc. |                                                                                                                                                                                 | Exp.          | Calc. |
| O(31)-Ti(1)-O(41)                                                                                                                | 98.34(7)      | 98.6  | O(17)-Ti(1)-O(16)                                                                                                                                                               | 105.82(19)    | 104.9 |
| O(31)-Ti(1)-O(16)                                                                                                                | 100.86(7)     | 102.0 | O(17)-Ti(1)-O(21)                                                                                                                                                               | 101.6(2)      | 104.1 |
| O(41)-Ti(1)-O(16)                                                                                                                | 101.60(6)     | 100.1 | O(16)-Ti(1)-O(21)                                                                                                                                                               | 152.6(2)      | 150.8 |
| O(31)-Ti(1)-O(21)                                                                                                                | 103.26(7)     | 102.6 | O(17)-Ti(1)-O(61)                                                                                                                                                               | 90.4(2)       | 89.9  |
| O(41)-Ti(1)-O(21)                                                                                                                | 91.45(7)      | 91.9  | O(16)-Ti(1)-O(61)                                                                                                                                                               | 89.64(19)     | 88.9  |
| O(16)-Ti(1)-O(21)                                                                                                                | 150.51(8)     | 150.6 | O(21)-Ti(1)-O(61)                                                                                                                                                               | 89.14(19)     | 88.0  |
| O(31)-Ti(1)-O(1)                                                                                                                 | 166.71(7)     | 165.2 | O(17)-Ti(1)-O(52)                                                                                                                                                               | 90.5(2)       | 93.5  |
| O(41)-Ti(1)-O(1)                                                                                                                 | 91.67(6)      | 92.9  | O(16)-Ti(1)-O(52)                                                                                                                                                               | 89.70(19)     | 89.1  |
| O(16)-Ti(1)-O(1)                                                                                                                 | 85.54(6)      | 85.1  | O(21)-Ti(1)-O(52)                                                                                                                                                               | 91.11(19)     | 92.4  |
| O(21)-Ti(1)-O(1)                                                                                                                 | 67.58(6)      | 67.4  | O(61)-Ti(1)-O(52)                                                                                                                                                               | 179.0(2)      | 176.4 |
| O(31)-Ti(1)-O(2)#1                                                                                                               | 84.84(7)      | 85.3  | O(17)-Ti(1)-O(23)                                                                                                                                                               | 175.8(2)      | 178.5 |
| O(41)-Ti(1)-O(2)#1                                                                                                               | 171.77(7)     | 172.5 | O(16)-Ti(1)-O(23)                                                                                                                                                               | 76.33(18)     | 75.1  |
| O(16)-Ti(1)-O(2)#1                                                                                                               | 85.16(5)      | 85.2  | O(21)-Ti(1)-O(23)                                                                                                                                                               | 76.37(19)     | 75.9  |
| O(21)-Ti(1)-O(2)#1                                                                                                               | 80.41(6)      | 81.1  | O(61)-Ti(1)-O(23)                                                                                                                                                               | 93.29(19)     | 91.6  |
| O(1)-Ti(1)-O(2)#1                                                                                                                | 84.12(6)      | 82.3  | O(52)-Ti(1)-O(23)                                                                                                                                                               | 85.85(18)     | 85.0  |
| O(31)-Ti(1)-Ti(2)                                                                                                                | 136.14(5)     | 134.8 | O(17)-Ti(1)-Ti(3)                                                                                                                                                               | 142.97(14)    | 141.8 |
| O(41)-Ti(1)-Ti(2)                                                                                                                | 82.29(5)      | 85.5  | O(16)-Ti(1)-Ti(3)                                                                                                                                                               | 40.32(13)     | 39.1  |
| O(16)-Ti(1)-Ti(2)                                                                                                                | 122.13(5)     | 121.7 | O(21)-Ti(1)-Ti(3)                                                                                                                                                               | 113.44(14)    | 113.1 |
| O(21)-Ti(1)-Ti(2)                                                                                                                | 33.26(4)      | 32.2  | O(61)-Ti(1)-Ti(3)                                                                                                                                                               | 101.36(15)    | 99.3  |
| O(1)-Ti(1)-Ti(2)                                                                                                                 | 36.68(4)      | 36.6  | O(52)-Ti(1)-Ti(3)                                                                                                                                                               | 77.67(14)     | 77.2  |
| O(2)#-Ti(1)-Ti(2)                                                                                                                | 90.15(4)      | 87.2  | O(23)-Ti(1)-Ti(3)                                                                                                                                                               | 37.97(12)     | 37.8  |
| O(61)-Ti(2)-O(51)                                                                                                                | 107.54(10)    | 108.2 | O(17)#1-Ti(2)-O(16)                                                                                                                                                             | 106.52(19)    | 106.7 |
| O(61)-Ti(2)-O(3)                                                                                                                 | 106.21(8)     | 106.0 | O(17)#1-Ti(2)-O(1)                                                                                                                                                              | 100.76(19)    | 103.2 |

|                     |            |       |                       |            |       |
|---------------------|------------|-------|-----------------------|------------|-------|
| O(51)-Ti(2)-O(3)    | 95.72(8)   | 93.6  | O(16)-Ti(2)-O(1)      | 152.5(2)   | 150.1 |
| O(61)-Ti(2)-O(21)   | 102.92(8)  | 104.6 | O(17)#1-Ti(2)-O(41)   | 91.5(2)    | 90.7  |
| O(51)-Ti(2)-O(21)   | 97.16(8)   | 99.1  | O(16)-Ti(2)-O(41)     | 89.34(19)  | 88.6  |
| O(3)-Ti(2)-O(21)    | 142.74(7)  | 141.1 | O(1)-Ti(2)-O(41)      | 93.4(2)    | 93.1  |
| O(61)-Ti(2)-O(1)    | 108.26(9)  | 107.6 | O(17)#1-Ti(2)-O(62)#1 | 90.7(2)    | 90.2  |
| O(51)-Ti(2)-O(1)    | 144.09(8)  | 144.2 | O(16)-Ti(2)-O(62)#1   | 88.01(18)  | 89.2  |
| O(3)-Ti(2)-O(1)     | 76.93(6)   | 75.8  | O(1)-Ti(2)-O(62)#1    | 88.3(2)    | 88.6  |
| O(21)-Ti(2)-O(1)    | 72.19(6)   | 72.5  | O(41)-Ti(2)-O(62)#1   | 176.96(19) | 177.8 |
| O(61)-Ti(2)-Ti(1)   | 119.65(7)  | 118.1 | O(17)#1-Ti(2)-O(3)    | 176.2(2)   | 175.3 |
| O(51)-Ti(2)-Ti(1)   | 116.53(7)  | 119.8 | O(16)-Ti(2)-O(3)      | 76.00(18)  | 74.8  |
| O(3)-Ti(2)-Ti(1)    | 108.03(5)  | 107.5 | O(1)-Ti(2)-O(3)       | 76.94(18)  | 75.6  |
| O(21)-Ti(2)-Ti(1)   | 35.67(4)   | 35.3  | O(41)-Ti(2)-O(3)      | 85.6(2)    | 84.8  |
| O(1)-Ti(2)-Ti(1)    | 39.10(4)   | 38.7  | O(62)#1-Ti(2)-O(3)    | 92.33(18)  | 94.4  |
| Ti(1)#1-O(16)-Ti(1) | 142.49(12) | 144.9 | O(17)#1-Ti(2)-Ti(3)   | 143.93(14) | 142.4 |
|                     |            |       | O(16)-Ti(2)-Ti(3)     | 40.38(13)  | 39.0  |
|                     |            |       | O(1)-Ti(2)-Ti(3)      | 113.89(15) | 112.6 |
|                     |            |       | O(41)-Ti(2)-Ti(3)     | 77.24(14)  | 76.7  |
|                     |            |       | O(62)#1-Ti(2)-Ti(3)   | 99.76(13)  | 101.4 |
|                     |            |       | O(3)-Ti(2)-Ti(3)      | 37.60(11)  | 37.6  |
|                     |            |       | O(71)-Ti(3)-O(3)      | 105.8(2)   | 106.4 |
|                     |            |       | O(71)-Ti(3)-O(23)     | 103.5(2)   | 102.4 |
|                     |            |       | O(3)-Ti(3)-O(23)      | 150.71(19) | 151.2 |
|                     |            |       | O(71)-Ti(3)-O(42)     | 94.6(3)    | 94.1  |
|                     |            |       | O(3)-Ti(3)-O(42)      | 88.0(2)    | 88.4  |
|                     |            |       | O(23)-Ti(3)-O(42)     | 88.81(19)  | 89.5  |
|                     |            |       | O(71)-Ti(3)-O(51)     | 92.6(3)    | 93.4  |
|                     |            |       | O(3)-Ti(3)-O(51)      | 90.9(2)    | 91.0  |
|                     |            |       | O(23)-Ti(3)-O(51)     | 88.6(2)    | 87.4  |
|                     |            |       | O(42)-Ti(3)-O(51)     | 172.8(2)   | 172.3 |
|                     |            |       | O(71)-Ti(3)-O(16)     | 177.9(3)   | 177.8 |
|                     |            |       | O(3)-Ti(3)-O(16)      | 75.47(17)  | 75.8  |
|                     |            |       | O(23)-Ti(3)-O(16)     | 75.29(17)  | 75.4  |
|                     |            |       | O(42)-Ti(3)-O(16)     | 87.09(19)  | 86.3  |
|                     |            |       | O(51)-Ti(3)-O(16)     | 85.71(19)  | 86.1  |
|                     |            |       | O(71)-Ti(3)-Ti(1)     | 142.43(19) | 142.5 |
|                     |            |       | O(3)-Ti(3)-Ti(1)      | 110.37(14) | 109.9 |
|                     |            |       | O(23)-Ti(3)-Ti(1)     | 41.27(13)  | 41.9  |
|                     |            |       | O(42)-Ti(3)-Ti(1)     | 96.57(15)  | 96.2  |
|                     |            |       | O(51)-Ti(3)-Ti(1)     | 77.09      | 76.8  |
|                     |            |       | O(16)-Ti(3)-Ti(1)     | 35.94(12)  | 35.4  |
|                     |            |       | O(71)-Ti(3)-Ti(2)     | 145.41(19) | 147.0 |
|                     |            |       | O(3)-Ti(3)-Ti(2)      | 41.21(13)  | 42.5  |
|                     |            |       | O(23)-Ti(3)-Ti(2)     | 109.84(13) | 109.3 |
|                     |            |       | O(42)-Ti(3)-Ti(2)     | 77.49(14)  | 77.3  |
|                     |            |       | O(51)-Ti(3)-Ti(2)     | 97.02(13)  | 97.1  |
|                     |            |       | O(16)-Ti(3)-Ti(2)     | 36.21(12)  | 35.2  |
|                     |            |       | Ti(1)-Ti(3)-Ti(2)     | 72.15(4)   | 70.6  |
|                     |            |       | Ti(1)-O(16)-Ti(2)     | 152.8(2)   | 148.7 |
|                     |            |       | Ti(1)-O(16)-Ti(3)     | 103.74(18) | 105.6 |
|                     |            |       | Ti(2)-O(16)-Ti(3)     | 103.4(2)   | 105.8 |
|                     |            |       | Ti(1)-O(17)-Ti(2)#1   | 144.6(3)   | 146.1 |

Symmetry transformations used to generate equivalent atoms:

- (1) #1 -x+1, y, -z+3/2
- (2) #1 -x+1, -y+2, -z+1

**Table S3.** Hirshfeld atomic charges (in au.) obtained at the B3LYP/6-31G(d,p) level of theory for **1** and **2**.

| [Ti <sub>4</sub> O(O <sup>i</sup> Pr) <sub>10</sub> (O <sub>3</sub> C <sub>14</sub> H <sub>8</sub> ) <sub>2</sub> ] ( <b>1</b> ) |        | [Ti <sub>6</sub> O <sub>4</sub> (O <sup>i</sup> Pr) <sub>2</sub> (O <sub>3</sub> C <sub>14</sub> H <sub>8</sub> ) <sub>4</sub> (O <sub>2</sub> CEt) <sub>6</sub> ] ( <b>2</b> ) |        |
|----------------------------------------------------------------------------------------------------------------------------------|--------|---------------------------------------------------------------------------------------------------------------------------------------------------------------------------------|--------|
| Atom                                                                                                                             | Charge | Atom                                                                                                                                                                            | Charge |
| Ti1                                                                                                                              | 0.581  | Ti1                                                                                                                                                                             | 0.622  |
| Ti2                                                                                                                              | 0.601  | Ti2                                                                                                                                                                             | 0.623  |
| O16                                                                                                                              | -0.389 | Ti3                                                                                                                                                                             | 0.595  |
| O1                                                                                                                               | -0.197 | O16                                                                                                                                                                             | -0.369 |
| O2                                                                                                                               | -0.193 | O17                                                                                                                                                                             | -0.349 |
| O3                                                                                                                               | -0.287 | O1                                                                                                                                                                              | -0.238 |
| O21                                                                                                                              | -0.254 | O3                                                                                                                                                                              | -0.249 |
| O31                                                                                                                              | -0.253 | O21                                                                                                                                                                             | -0.239 |
| O41                                                                                                                              | -0.273 | O23                                                                                                                                                                             | -0.250 |
| O51                                                                                                                              | -0.266 | O41                                                                                                                                                                             | -0.217 |
| O61                                                                                                                              | -0.272 | O42                                                                                                                                                                             | -0.208 |
|                                                                                                                                  |        | O51                                                                                                                                                                             | -0.208 |
|                                                                                                                                  |        | O52                                                                                                                                                                             | -0.218 |
|                                                                                                                                  |        | O61                                                                                                                                                                             | -0.210 |
|                                                                                                                                  |        | O62                                                                                                                                                                             | -0.212 |
|                                                                                                                                  |        | O2                                                                                                                                                                              | -0.265 |
|                                                                                                                                  |        | O22                                                                                                                                                                             | -0.266 |
|                                                                                                                                  |        | O71                                                                                                                                                                             | -0.222 |

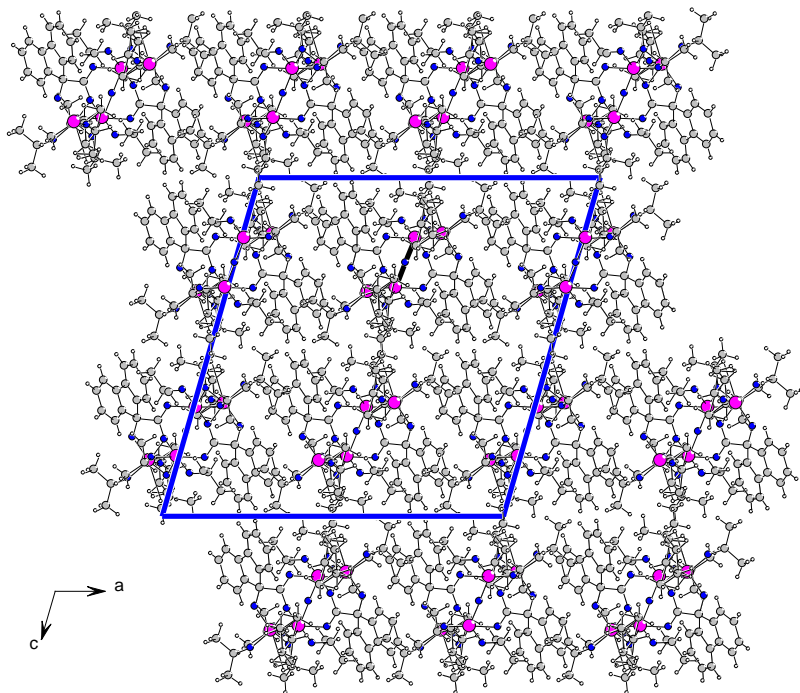

**Figure S1.** The TOCs packing in the crystal network of (1) along *b* axis.

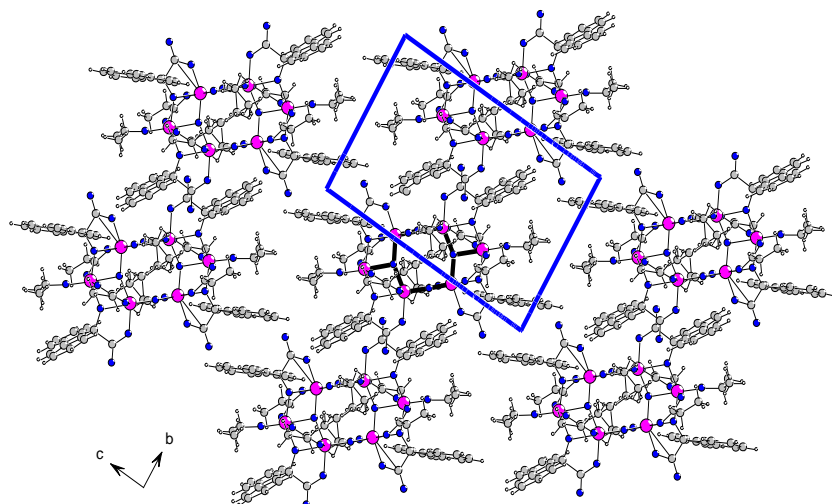

**Figure S2.** The differences in TOCs packing in the crystal network of (2) along *a* axis (b).



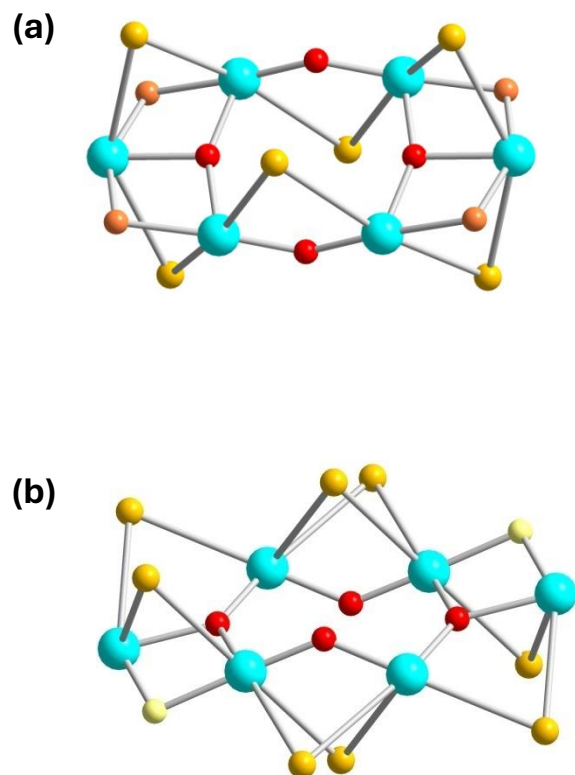

**Figure S3.** Cages of  $[[\text{Ti}_6\text{O}_4(\text{O}^i\text{Pr})_2(\text{O}_3\text{C}_{14}\text{H}_8)_4(\text{O}_2\text{C}_3\text{H}_5)_6]$  (2) (a) and  $[\text{Ti}_6\text{O}_4(\text{O}^i\text{Bu})_8(\text{O}_2\text{CC}_{13}\text{H}_9)_8] \cdot \text{Me}_2\text{CO}$  (b)<sup>1</sup>. Titanium atoms in cyan, oxo bridges in red, orange – 9-hydroxy-9-fluorencarboxylate ligand, dark yellow – propionate, yellow – 9-fluorencarboxylate ligand, light yellow – bridging isobutanolate. The central part -  $[\text{Ti}_6(\mu_3\text{-O})_2(\mu\text{-O})_2]$  is common but due to different complex content the connectivity of lateral ligands is distinct.

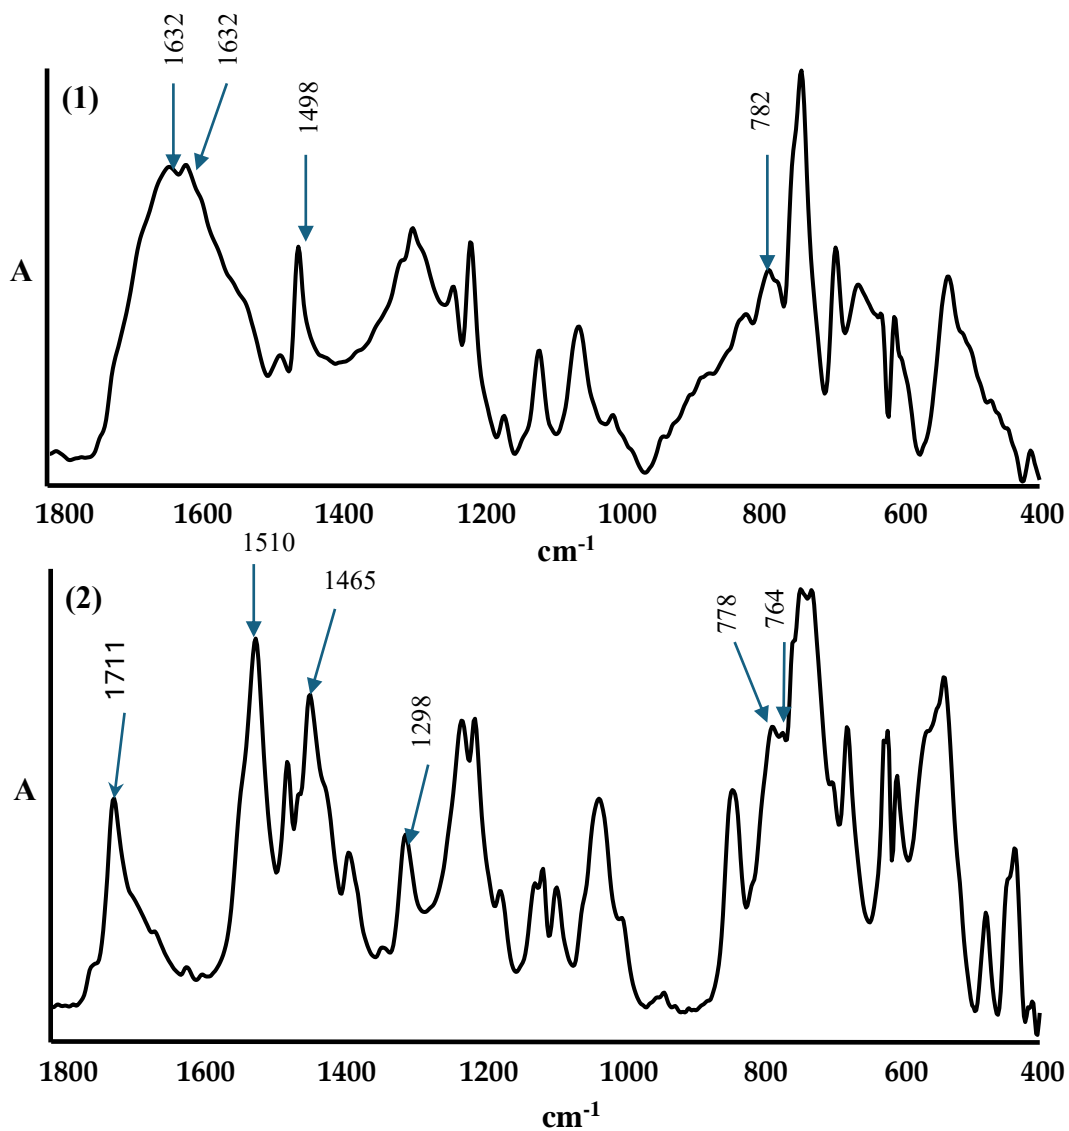

**Figure S4.** IR spectra of (1) and (2)

### References

- 1 B. Kubiak, P. Piszczek, A. Radtke, T. Muzioł, G. Wrzeszcz and P. Golińska, *Crystals*, 2023, 13, 998.
