# Supplementary figures and images for: Investigation of titanium(iv)-oxo complexes stabilized with α-hydroxy carboxylate ligands: structural analysis and DFT studies
Source: Royal Society of Chemistry journal article supplement (doi:10.1039/d4dt01710b), 2024-01-01

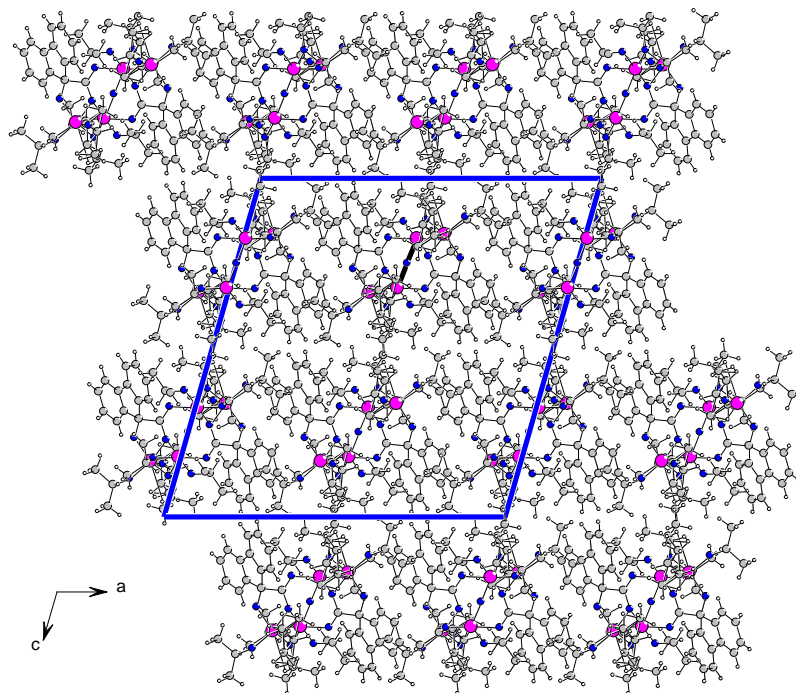

Supplement: d4dt01710b2.pdf [file d4dt01710b2.pdf]

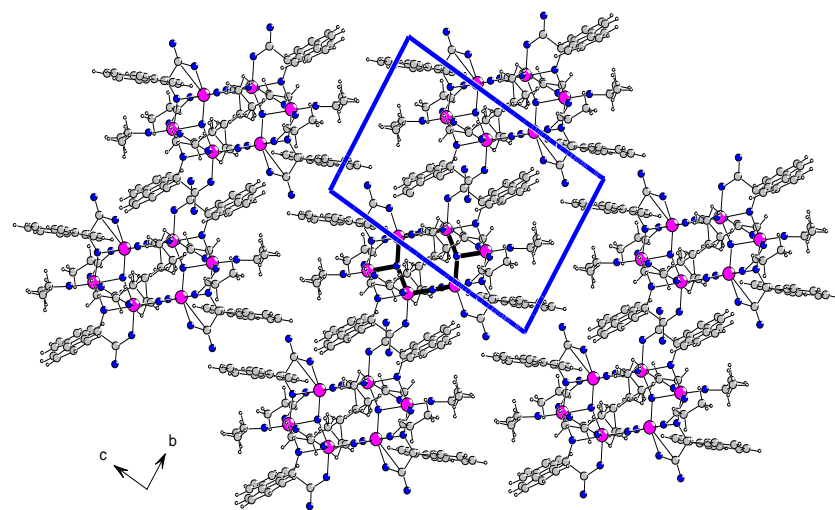

Supplement: d4dt01710b3.pdf [file d4dt01710b3.pdf]

**(a)**

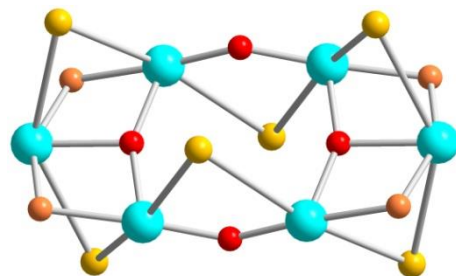

**(b)**

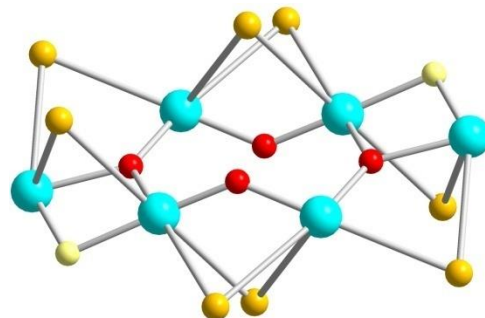

Supplement: d4dt01710b4.pdf [file d4dt01710b4.pdf]

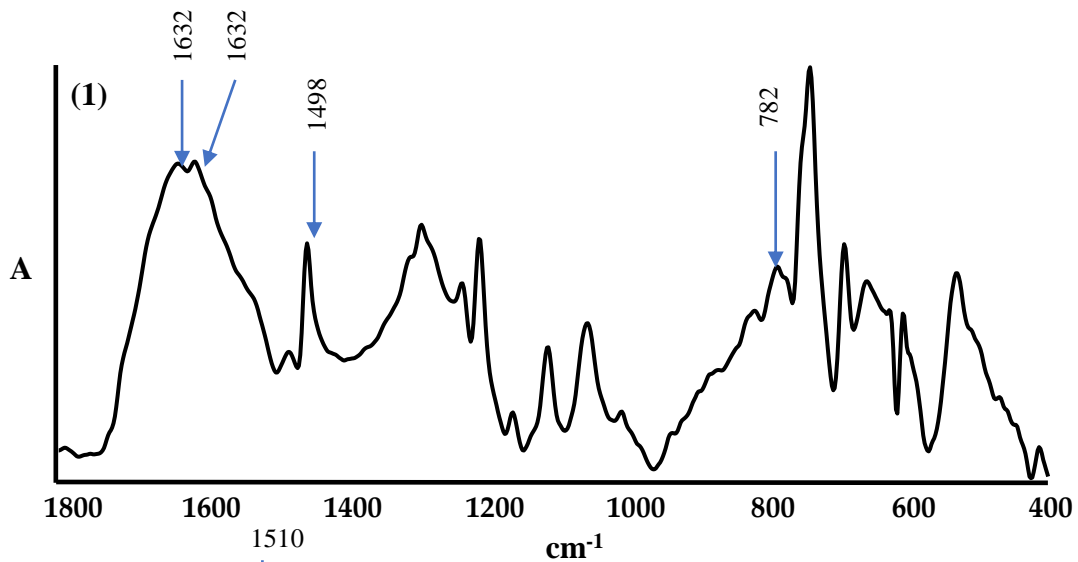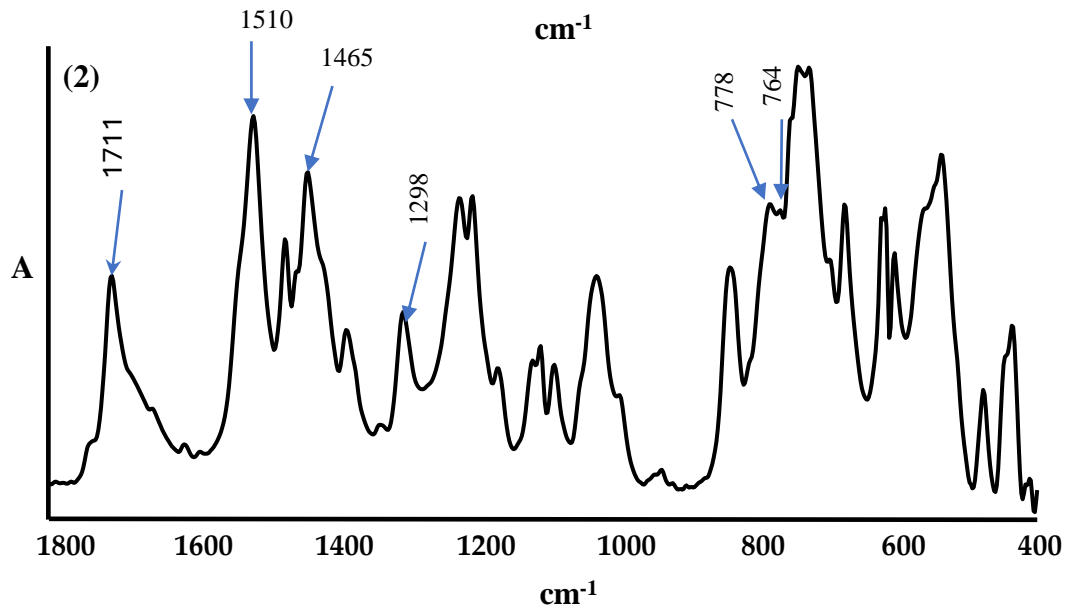

Supplement: d4dt01710b5.pdf [file d4dt01710b5.pdf]
